# Supplementary material for: Increased ratio of red cell distribution width to lymphocyte percentage as a new preoperative marker for unfavorable survival outcomes in upper tract urothelial carcinoma
Source: PubMed Central journal article supplement — Biomed Rep. 2024 Dec 10;22(2):32. doi: 10.3892/br.2024.1910 (PMC11668139; doi:10.3892/br.2024.1910), 2024-12-10
Supplement: Supplementary_Data.pdf [file Supplementary_Data.pdf]

Figure S1. AUC to determine the predictive ability of cancer-specific survival according to RDW, LYM% or RDW-to-LYM% ratio. RDW-to-LYM% ratio, red cell distribution width to lymphocyte percentage ratio; AUC, area under the receiver-operating characteristic curve; CI, confidence interval.

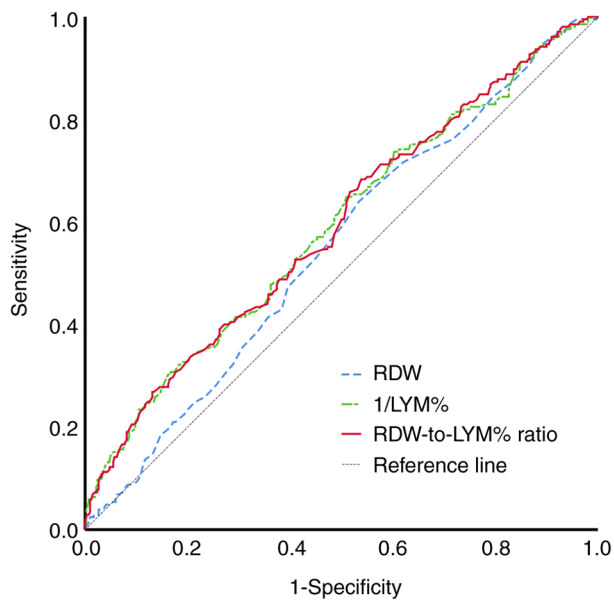

|                   | AUC   | P-value | 95% CI      |
|-------------------|-------|---------|-------------|
| RDW               | 0.550 | 0.044   | 0.502–0.597 |
| 1/LYM%            | 0.590 | <0.001  | 0.542–0.638 |
| RDW-to-LYM% ratio | 0.592 | <0.001  | 0.544–0.640 |
